# Supplementary material for: Proton pump inhibitors and community acquired pneumonia
Source: HighWire-hosted journal article supplement (doi:10.1136/bmj.i6041), 2016-11-17
Supplement: bmj.i6041.pdf [file bmj.i6041.pdf]

# 质子泵抑制剂与社区获得性肺炎

观察到的两者联系可能是源于初始偏倚和指征混杂

## Proton pump inhibitors and community acquired pneumonia

The observed link is probably due to protopathic bias and confounding by indication

来源:BMJ 2016;355:i6041 doi: 10.1136/bmj.i6041

2004年一项巢式病例对照研究发表<sup>1</sup>,此后,人们开始担忧质子泵抑制剂(PPI)与患社区获得性肺炎的风险。此项研究表明,正在使用PPI的人群患社区获得性肺炎的风险明显高于停止使用PPI的人群。这项发现得到生物学基础理论的有力支持:胃酸受到抑制,导致细菌过度增殖,并且细菌被吸入的风险增高。研究者们相继进行了几项观察性研究及荟萃(meta)分析<sup>2-3</sup>。最近一项meta分析表明,PPI与社区获得性肺炎风险增加相关(合并估计值1.49,95%可信区间1.16~1.92; $I^2=99.2%$ )<sup>3</sup>。由于存在显著异质性,对于这些数据的正式meta分析得到的结论很可能存在偏颇,但对相同数据的定性分析同样表明,应用PPI可导致社区获得性肺炎风险增加。

Othman及其同事在*The BMJ*发表了一项回顾性队列研究(doi:10.1136/bmj.i5813),旨在探讨PPI与社区获得性肺炎风险之间的关系<sup>4</sup>。他们进行了3项分析:传统队列分析、病例自身对照的序列分析(即比较同一患者应用PPI前后社区获得性肺炎的发生率),及先验概率分析(即调整暴露组相关事件发生率的差异,从而降低时间固定混杂)。

队列研究发现PPI与社区获得性肺炎风险增加相关(发病率比1.67,1.55~1.79),其他研究未得到类似结论。病例自身对照的序列分析研究发现,PPI应用前30天内社区获得性肺炎发生率(发病率比1.92,1.84~2.00)高于PPI应用后30天的肺炎发生率(发病率比1.19,1.14~1.25),而先验概率分析发现PPI与社区获得性肺炎

风险降低相关(危害比0.91,0.83~0.99)。因此,研究者们认为社区获得性肺炎风险的增加可能是指征混杂所致。

目前证据表明这些因素与肺炎之间存在某种联系,但是仔细研究发现这种联系不可能是因果关系。之前的许多研究表明短期应用PPI后肺炎风险大幅增加,其中1项研究发现在应用PPI 2天内肺炎发生率增加了近6倍<sup>5</sup>。在如此短的时间窗内PPI就显著增加社区获得性肺炎风险显然不符合生物学的理念,提示存在初始偏倚或反向因果关系(即质子泵抑制剂被用于治疗肺炎的早期症状如胸痛,而该症状被误以为是胃酸反流所致)。

目前看来,指征混杂可能是观察到成人应用PPI时肺炎发病风险增加的主要原因。为了确定排除潜在胃食管反流疾病后的PPI作用,加拿大观察药物作用研究网络(CNODES)在3个国家的7个行政辖区内分析了新近使用非甾体抗炎药物的有限制队列<sup>6</sup>。该研究将新应用PPI和相同天数非甾体抗炎药者定义为暴露组,有限制队列是不太可能给患有反流的患者预防性应用PPI,以排除先前研究中存在的指征混杂。汇总所有地域的数据后发现,PPI与社区获得性肺炎住院率增加无相关性(比值比1.05,0.89~1.25; $I^2=0%$ )。其中,加拿大新斯科舍省肺炎风险增加(比值比3.73,1.12~12.36),而该地区的处方规定限制了PPI应用于有胃糜烂证据的患者,进而证明胃食管反流,而不是PPI,与肺炎风险增高有关的假设。此假设与Othman团队的发现一致,

Kristian B Filion  
assistant professor<sup>1,2</sup>

<sup>1</sup>Center for Clinical Epidemiology, Lady Davis Institute, Jewish General Hospital, Montreal, Quebec, Canada;

<sup>2</sup>Departments of Medicine and of Epidemiology, Biostatistics, and Occupational Health, McGill University, Montreal, Quebec, Canada

Correspondence to:  
kristian.filion@mcgill.ca

石欣雨 译  
施焕中 校  
首都医科大学附属  
北京朝阳医院  
呼吸重症科

他们报告在开始应用PPI 30天之前的风险高于应用PPI后的30天内。在另一项研究中,PPI不仅与肺炎风险增高有关,还与骨关节炎、胸痛、尿路感染风险有关<sup>7</sup>。由于PPI不可能与后3种情况有因果关系,这项研究更加证明了指征混杂是导致PPI与社区获得性肺炎之间存在关系的原因。

尽管诸多证据表明应用PPI的人群患社区获得性肺炎的风险增加,但二者之间不太可能是因果关系。Othman及其同事的研究增加了证据,证明风险增加与初始偏倚和指征混杂有关,是由于潜在的反流,而不是真正的PPI不良作用。

利益竞争 (Competing interests): I have read and understood the BMJ Group policy on declaration of interests and declare the following interests: KBF holds a Canadian Institutes of Health Research (CIHR) New Investigator Award and is a member of the Steering Committee of CNODES, a collaborating centre of the Drug Safety and Effectiveness Network (DSEN) that is funded by the CIHR (grant number DSE-146021). 来源及同行评议 (Provenance and peer review): Commissioned; not externally peer reviewed.

#### 参考文献

1 Laheij RJ, Sturkenboom MC, Hassing RJ, Dieleman J, Stricker

BH, Jansen JB. Risk of community-acquired pneumonia and use of gastric acid-suppressive drugs. *JAMA* 2004;292:1955-60. doi: 10.1001/jama.292.16.1955 pmid:15507580.

2 Eom CS, Jeon CY, Lim JW, Cho EG, Park SM, Lee KS. Use of acid-suppressive drugs and risk of pneumonia: a systematic review and meta-analysis. *CMAJ* 2011;183:310-9. doi:10.1503/cmaj.092129 pmid:21173070.

3 Lambert AA, Lam JO, Paik JJ, Ugarte-Gil C, Drummond MB, Crowell TA. Risk of community-acquired pneumonia with outpatient proton-pump inhibitor therapy: a systematic review and meta-analysis. *PLoS One* 2015;10:e0128004. doi:10.1371/journal.pone.0128004 pmid:26042842.

4 Othman F, Crooks C, Card T. Community acquired pneumonia incidence before and after proton pump inhibitor prescription: population based study. *BMJ* 2016;355:i5813.

5 Sarkar M, Hennessy S, Yang YX. Proton-pump inhibitor use and the risk for community-acquired pneumonia. *Ann Intern Med* 2008; 149:391-8. doi:10.7326/0003-4819-149-6-200809160-00005 pmid: 18794558.

6 Filion KB, Chateau D, Targownik LE, et al. CNODES Investigators. Proton pump inhibitors and the risk of hospitalisation for community-acquired pneumonia: replicated cohort studies with meta-analysis. *Gut* 2014;63:552-8. doi: 10.1136/gutjnl-2013-304738 pmid:23856153.

7 Jena AB, Sun E, Goldman DP. Confounding in the association of proton pump inhibitor use with risk of community-acquired pneumonia. *J Gen Intern Med* 2013;28:223-30. doi: 10.1007/s11606-012-2211-5 pmid:22956446.

BMJ takes no responsibility for the accuracy of the translation from the published English language original and is not liable for any errors that may occur.

# BMJ
